# Supplementary figures and images for: Temperature dependence of the flash duration of the firefly Luciola praeusta
Source: Royal Society of Chemistry journal article supplement (doi:10.1039/c4pp00319e), 2014-10-21

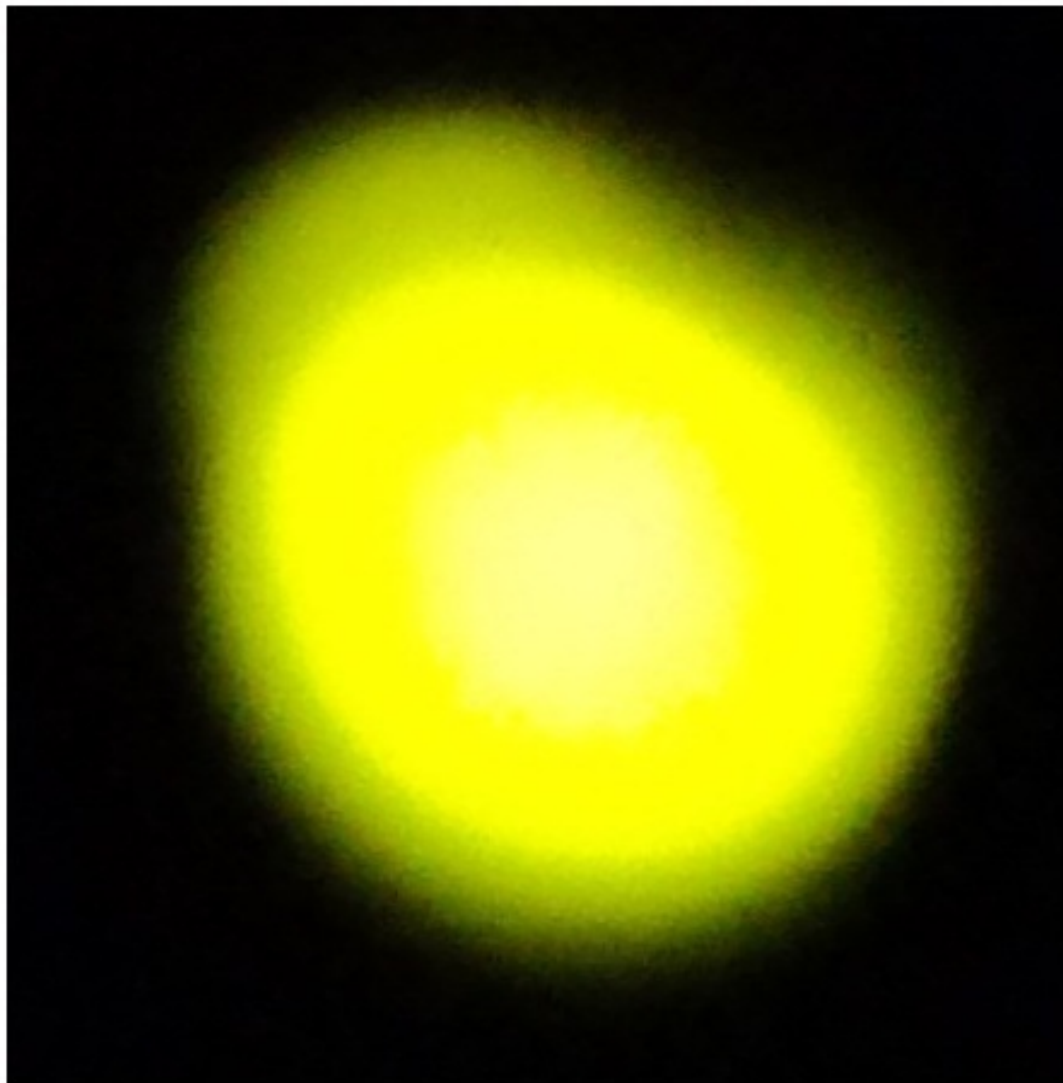

The lantern of the flashing specimen at 25 °C

Supplement: c4pp00319e2.pdf [file c4pp00319e2.pdf]

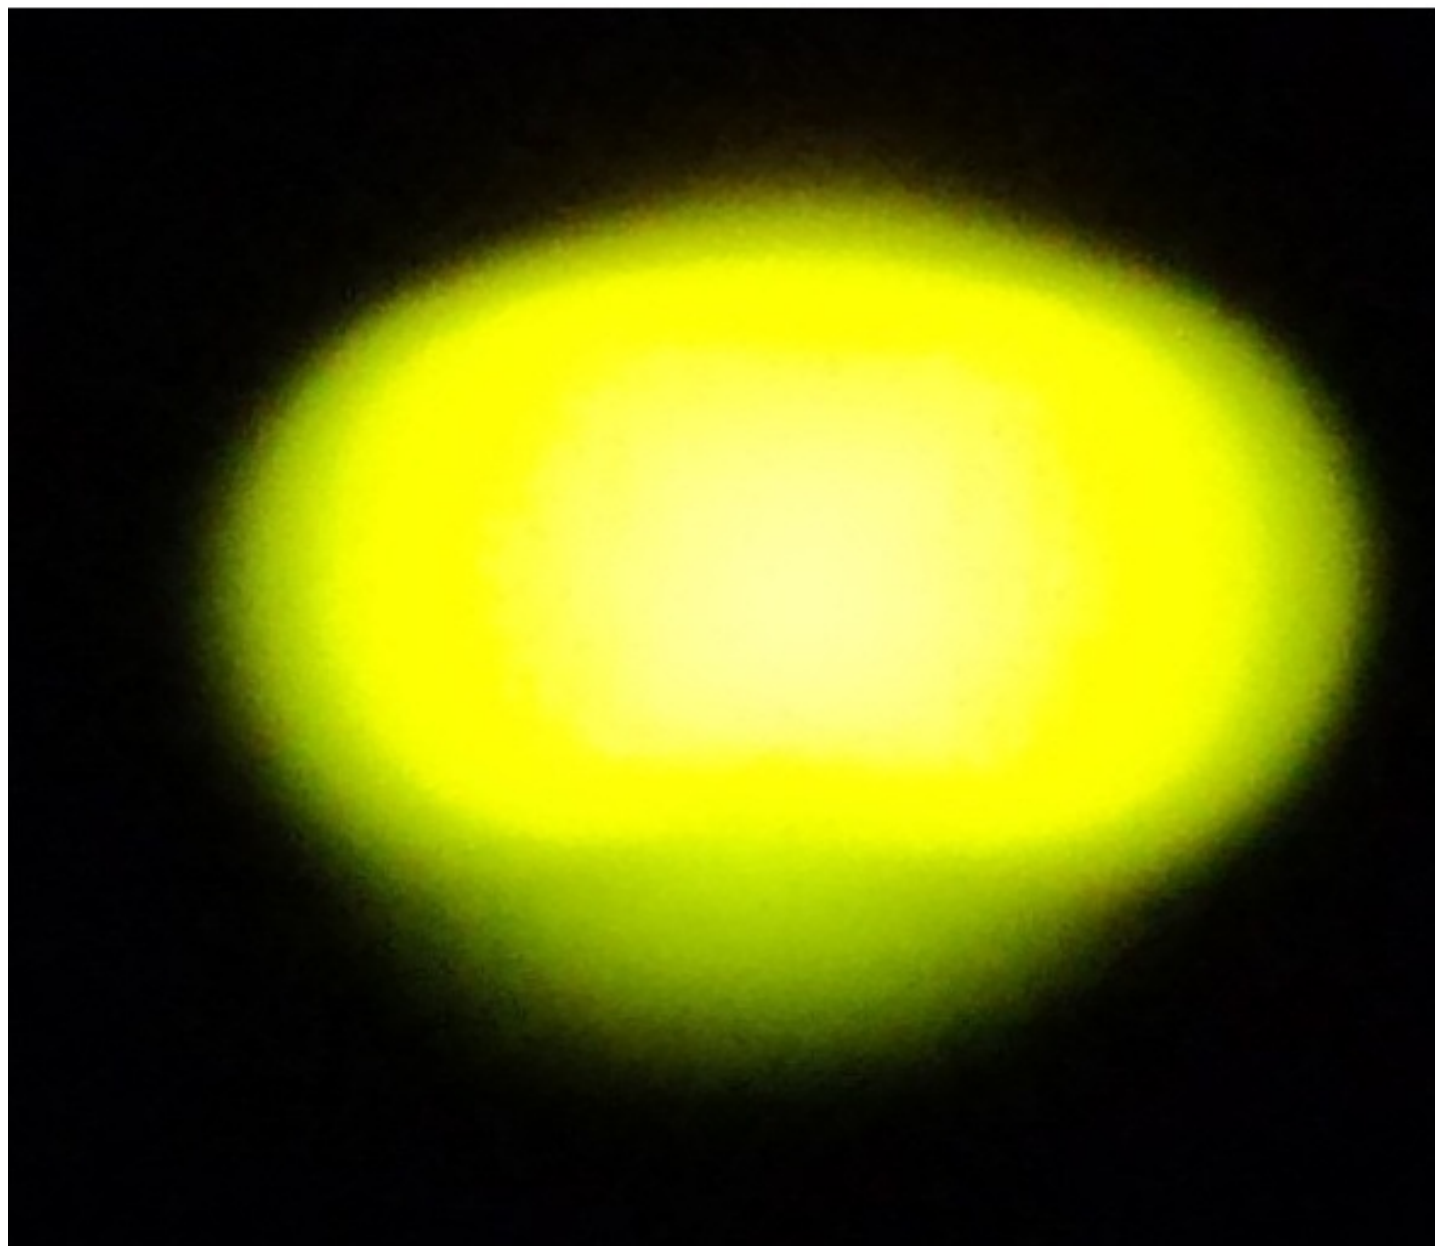

The lantern of the flashing specimen at 30 °C

Supplement: c4pp00319e3.pdf [file c4pp00319e3.pdf]

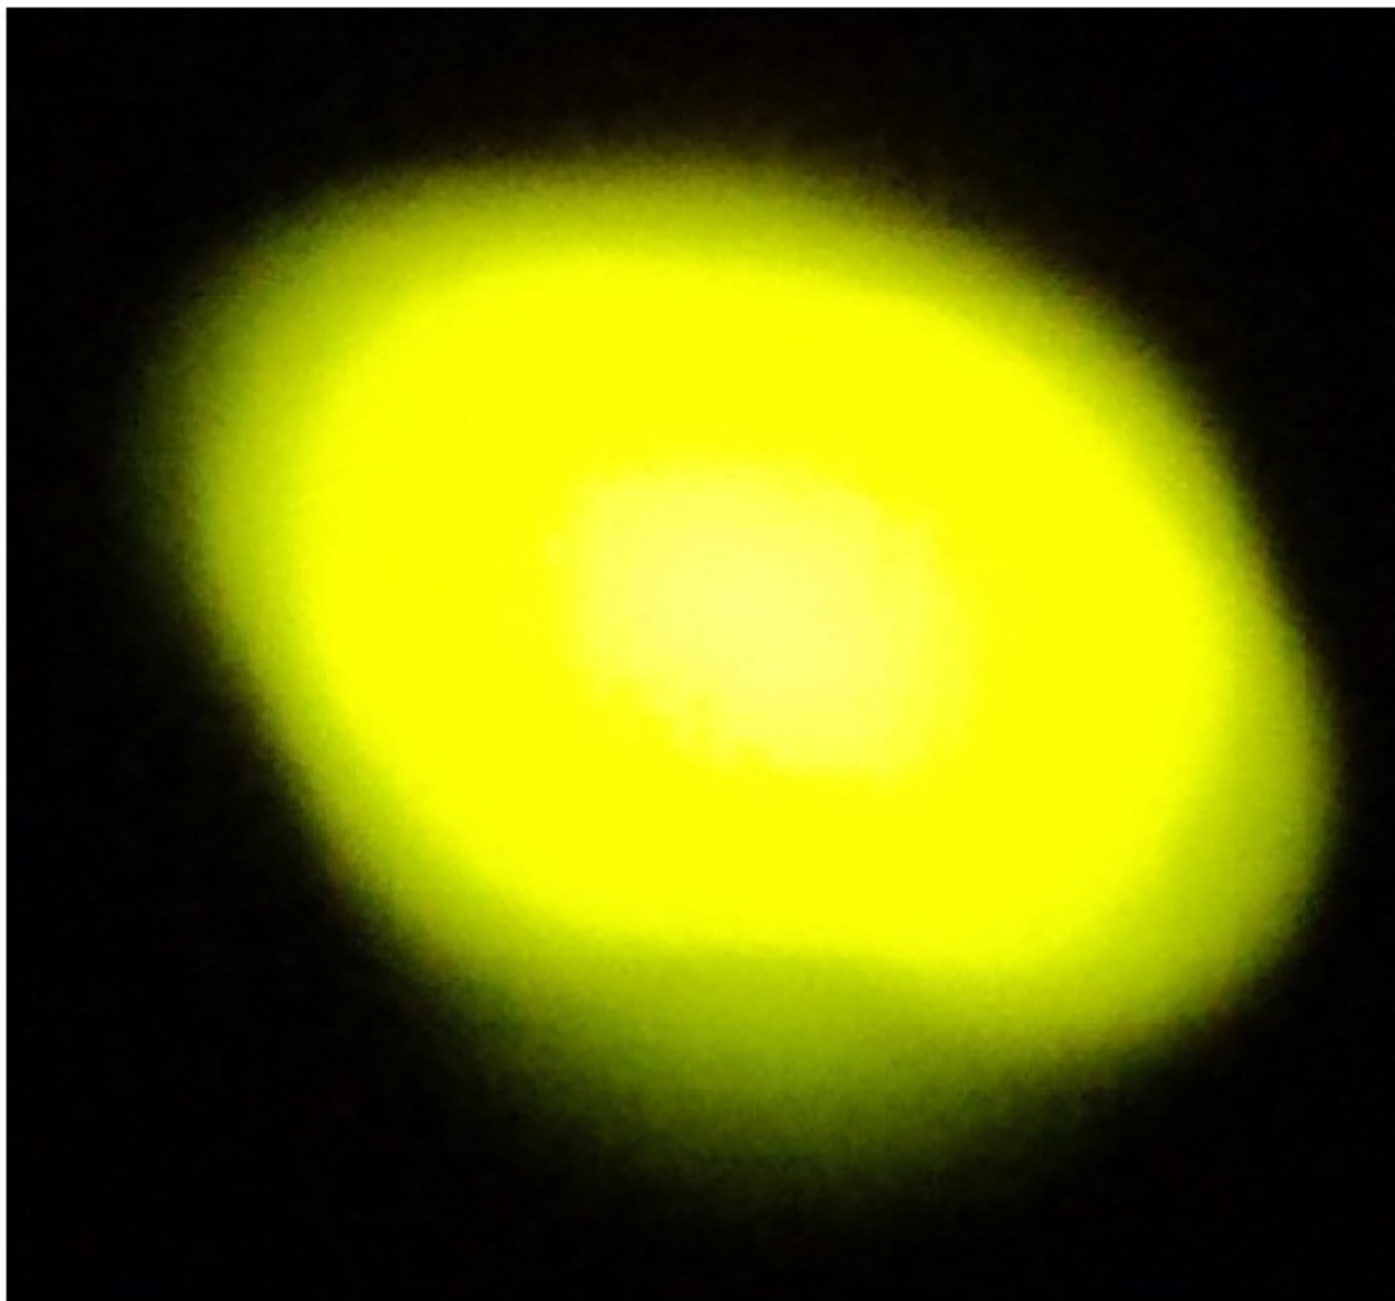

The lantern of the flashing specimen at 35 °C

Supplement: c4pp00319e4.pdf [file c4pp00319e4.pdf]

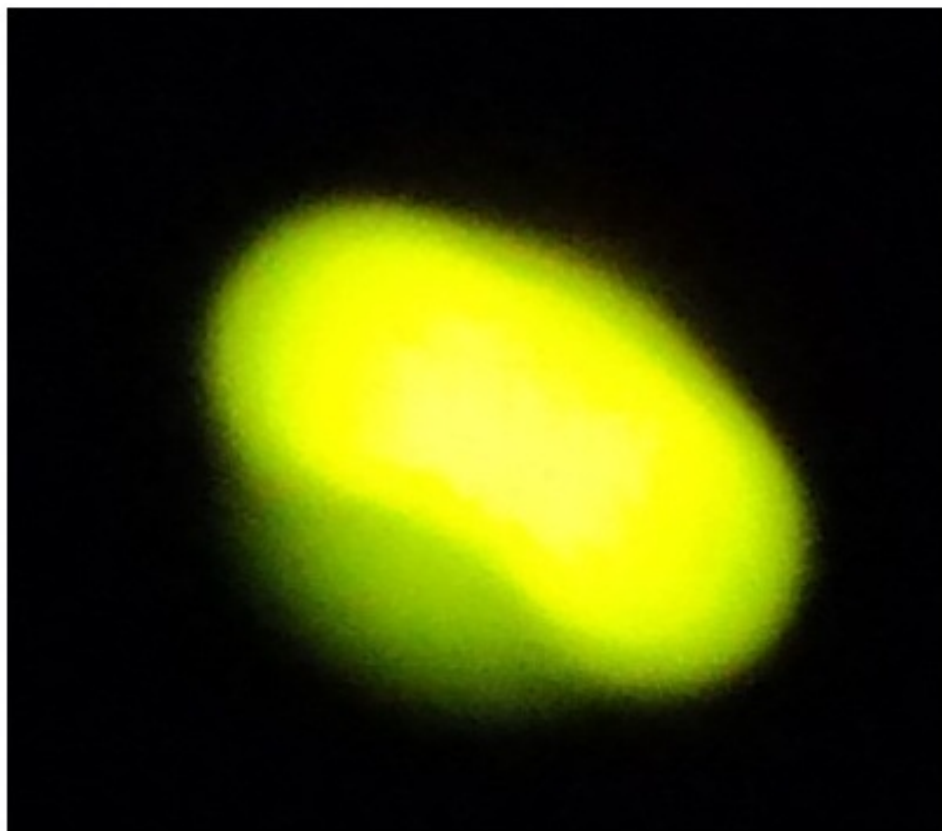

The lantern of the flashing specimen at 40<sup>0</sup>C

Supplement: c4pp00319e5.pdf [file c4pp00319e5.pdf]
